# Supplementary material for: Early Occupational Therapy Intervention post-stroke (EOTIPS): A randomized controlled trial
Source: PubMed Central journal article supplement (PMC11332918; doi:10.1371/journal.pone.0308800), 2024-08-19
Supplement: pone.0308800.s003.pdf [file pone.0308800.s003.pdf]

## DOCUMENTO ESTADO DE PROYECTO

|                     |                                                                                                     |
|---------------------|-----------------------------------------------------------------------------------------------------|
| Título completo:    | Intervención de terapia ocupacional precoz en el proceso de alta hospitalaria tras sufrir un ictus. |
| Código del estudio: | 02/21PI13                                                                                           |
| Promotor:           | (No hay promotor/a asociado/a)                                                                      |
| Comité:             | CEI de Centro Provincial de Málaga                                                                  |
| Protocolo:          | PROTOCOLO ESTUDIO TERAPIA OCUPACIONAL ICTUS.pdf                                                     |
| Versión Protocolo:  | 1.0                                                                                                 |
| Fecha Protocolo:    | 28/12/2021                                                                                          |
| HIP:                | HOJA DE INFORMACION A PACIENTE.pdf                                                                  |
| Versión HIP:        | 1.0                                                                                                 |
| Fecha HIP:          | 28/12/2021                                                                                          |
| Solicitante:        | CARLOS DE LA CRUZ COSME                                                                             |
| NIF solicitante:    | 74851681K                                                                                           |
| Fecha actual:       | 13/02/2021                                                                                          |
| Estado:             | ENVIADO                                                                                             |

### Centros del proyecto

| Investigador/a principal            | Centros participantes                        | Servicio |
|-------------------------------------|----------------------------------------------|----------|
| CARLOS DE LA CRUZ COSME             | HOSPITAL UNIVERSITARIO VIRGEN DE LA VICTORIA |          |
| JOSE PABLO LARA MUÑOZ               | Universidad de Málaga                        |          |
| MARIA DEL CARMEN RODRIGUEZ MARTINEZ | Universidad de Málaga                        |          |
| PATRICIA GARCIA PEREZ               | LAS LAGUNAS                                  |          |

### Documentos del proyecto

| Nombre                                                       | Version | Fecha |
|--------------------------------------------------------------|---------|-------|
| IDONEIDAD INVESTIGADORES TERAPIA OCUPACIONAL.pdf             | 1.0     |       |
| COMPROMISO INVESTIGADORES TERAPIA OCUPACIONAL_compressed.pdf | 1.0     |       |
| IDONEIDAD INSTALACIONES TERAPIA OCUPACIONAL.pdf              | 1.0     |       |
| PROTOCOLO ESTUDIO TERAPIA OCUPACIONAL ICTUS.pdf              | 1.0     |       |
| HOJA DE INFORMACION A PACIENTE.pdf                           | 1.0     |       |
| CONSENTIMIENTO INFORMADO .pdf                                | 1.0     |       |

### Estados del proyecto

| Estado final       | Fecha      |
|--------------------|------------|
| PENDIENTE DE ENVÍO | 11/02/2021 |
| ENVIADO            | 13/02/2021 |

Dra. Dña. Gloria Luque Fernández, Secretaria del CEI Provincial de Málaga

CERTIFICA:

Que en la sesión de CEI de fecha: 25/02/2021 ha evaluado la propuesta de D/Dña.: Carlos de la Cruz Cosme, referido al Proyecto de Investigación: "Intervención de terapia ocupacional precoz en el proceso de alta hospitalaria tras sufrir un ictus".

Este Comité lo considera ética y metodológicamente correcto.

La composición del CEI en esta sesión es la siguiente:

|                                                               |                                                                 |
|---------------------------------------------------------------|-----------------------------------------------------------------|
| Dra. Ana Alonso Torres (UGC Neurociencias)                    | Dra. M <sup>a</sup> Victoria de la Torre Prados (UMA)           |
| Dra. Encarnación Blanco Reina (Farmacología Clínica)          | D <sup>a</sup> . Inmaculada Doña Díaz (Alergología)             |
| Dra. Begoña Jiménez Rodríguez (UGC Oncología)                 | Dr. Andrés Fontalba Navas (UGC Salud Mental)                    |
| Dra. Marta Blasco Alonso (Obst. y Ginecología)                | D. José Manuel García Cabello                                   |
| Dr. Rafael Carvia Ponsaille (Anatomía Patológica)             | Dr. Victor Navas López (UGC Pediatría)                          |
| D <sup>a</sup> . Ana Díaz Ruíz (Licenciada en Derecho)        | Dra. M <sup>a</sup> Carmen Vela Márquez (Farmacéutica Distrito) |
| Dr. José C. Fernández García (UGC Endocrinología y Nutrición) |                                                                 |
| Dr. Manuel Herrera Gutiérrez (UGC UCI)                        |                                                                 |
| Dra. Begoña Jiménez Rodríguez (UGC Oncología)                 |                                                                 |
| Dr. José Leiva Fernández (Médico Familia)                     |                                                                 |
| Dra. M <sup>a</sup> Dolores López Carmona (Medicina Interna)  |                                                                 |
| Dr. Jesús López del Peral (Esp.Protec.Datos)                  |                                                                 |
| Dña. Carmen López Gálvez del Postigo (Miembro Lego)           |                                                                 |
| Dr. Antonio López Téllez (Médico de Familia)                  |                                                                 |
| Dra. Gloria Luque Fernández (Investigación)                   |                                                                 |
| Dra. Cristobalina Mayorga Mayorga (Laboratorio)               |                                                                 |
| Dra. M <sup>a</sup> Angeles Rosado Souvirón (UGC Farmacia)    |                                                                 |
| Dra. Leonor Ruíz Sicilia (UGC Salud Mental)                   |                                                                 |

Lo que firmo en Málaga, a 3 de marzo de 2021

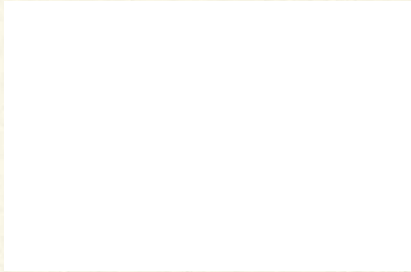

Fdo.: Dra. Gloria Luque Fernández  
Secretaria del CEI

## PROJECT STATUS DOCUMENT

Full title: Early occupational therapy intervention in the hospital discharge process after suffering a stroke.

Study code: 02/21PI13

Promoter: (There is no associated promoter)

Committee: CEI of the Provincial Center of Malaga (Provincial Research Ethics Committee of Malaga).

Protocol: OCCUPATIONAL THERAPY STROKE STUDY PROTOCOL.pdf

Protocol Version: 1.0

Protocol Date: 28/12/2021

HIP: PATIENT INFORMATION SHEET.pdf

HIP version: 1.0

HIP Date: 28/12/2021

Applicant: CARLOS DE LA CRUZ COSME

Applicant NIF: 74851681K

Current date: 13/02/2021

State: SENT

### Project centers

| Principal researcher                | Participating centers                        | Service |
|-------------------------------------|----------------------------------------------|---------|
| CARLOS DE LA CRUZ COSME             | VIRGEN DE LA VICTORIA<br>UNIVERSITY HOSPITAL |         |
| JOSE PABLO LARA MUÑOZ               | UNIVERSITY OF MALAGA                         |         |
| MARIA DEL CARMEN RODRIGUEZ MARTINEZ | UNIVERSITY OF MALAGA                         |         |
| PATRICIA GARCIA PEREZ               | LAS LAGUNAS                                  |         |

### Project documents

| Name                                                         | Version | Date |
|--------------------------------------------------------------|---------|------|
| SUITABILITY OF OCCUPATIONAL THERAPY<br>RESEARCHERS.pdf       | 1.0     |      |
| RESEARCHER COMMITMENT OCCUPATIONAL<br>THERAPY_compressed.pdf | 1.0     |      |
| SUITABILITY OF OCCUPATIONAL THERAPY<br>FACILITIES.pdf        | 1.0     |      |
| OCCUPATIONAL THERAPY STROKE STUDY<br>PROTOCOL.pdf            | 1.0     |      |
| PATIENT INFORMATION SHEET.pdf                                | 1.0     |      |
| INFORMED CONSENT .pdf                                        | 1.0     |      |

### Project status

| Final status    | Date       |
|-----------------|------------|
| SENDING PENDING | 11/02/2021 |
| SENT            | 13/02/2021 |

## Provincial Research Ethics Committee of Málaga (CEI)

Dr. Gloria Luque Fernández, Secretary of the provincial CEI of Málaga

### CERTIFIES

That during the CEI session that took place on 25<sup>th</sup> February 2021, it was evaluated the proposal of Mr. Carlos de la Cruz Cosme regarding the Research Project entitled: “Early Occupational Therapy Intervention in the process of hospital discharge after stroke”.

This committee considers the mentioned project is ethically and methodologically correct.

The composition of this CEI is the following:

|                                                                |                                                               |
|----------------------------------------------------------------|---------------------------------------------------------------|
| Dra. Ana Alonso Torres (Neurosciences UGC)                     | Dra. M <sup>a</sup> Victoria de la Torre Prados (UMA)         |
| Dra. Encarnación Blanco Reina (Clinical Pharmacology)          | Ms. Inmaculada Doña Díaz (Allergology)                        |
| Dra. Begoña Jiménez Rodríguez (Oncology UGC)                   | Dr. Andrés Fontalba Navas (Mental Health UGC)                 |
| Dra. Marta Blasco Alonso (Obstetrics and Gynecology)           | Mr. José Manuel García Cabello                                |
| Dr. Rafael Carvia Ponsaille (Pathology Anatomy)                | Dr. Víctor Navas López (Pediatrics UGC)                       |
| Ms. Ana Díaz Ruíz (Graduate in Law)                            | Dra. M <sup>a</sup> Carmen Vela Márquez (District Pharmacist) |
| Mr. José C. Fernández García (Endocrinology and Nutrition UGC) |                                                               |
| Dr. Manuel Herrera Gutiérrez (ICU UGC)                         |                                                               |
| Dra. Begoña Jiménez Rodríguez (Oncology UGC)                   |                                                               |
| Dr. José Leiva Fernández (Family Doctor)                       |                                                               |
| Dra. M <sup>a</sup> Dolores López Carmona (Internal Medicine)  |                                                               |
| Dr. Jesús López del Peral (Data Protection Specialist)         |                                                               |
| Ms. Carmen López Gálvez del Postigo (Non-Expert Member)        |                                                               |
| Dr. Antonio López Téllez (Family Doctor)                       |                                                               |
| Dra. Gloria Luque Fernández (Research)                         |                                                               |
| Dra. Cristobalina Mayorga Mayorga (Laboratory)                 |                                                               |
| Dra. M <sup>a</sup> Angeles Rosado Souvirón (Pharmacy UGC)     |                                                               |
| Dra. Leonor Ruíz Sicilia (Mental Health UGC)                   |                                                               |

Which I sign in Málaga, 3<sup>rd</sup> March 2021

Signature: Dra. Gloria Luque Fernández  
CEI Secretary

\* UGC = Clinical Management Unit

\* UMA = University of Málaga
